# Supplementary material for: Acupuncture for the treatment of phantom limb syndrome in lower limb amputees: a randomised controlled feasibility study
Source: PubMed Central journal article supplement (PMC5080724; doi:10.1186/s13063-016-1639-z), 2016-10-25
Supplement: 13063_2016_1639_MOESM2_ESM.pdf [file 13063_2016_1639_MOESM2_ESM.pdf]

## Acupuncture points used by practitioners during the feasibility study

| Residual limb                  | F  | Contralateral limb | F  | Body points | F | Points on Lx | F | Auricular acupuncture | Upper limb points to treat lower limb | F |
|--------------------------------|----|--------------------|----|-------------|---|--------------|---|-----------------------|---------------------------------------|---|
| Sp 8                           | 2  | Sp 3               | 1  | Yintang     | 1 | BI 23        | 5 | Yes X 2*              | LI 2                                  | 1 |
| Sp 9                           | 9  | Sp 4               | 9  | Du 20       | 1 | BI 24        | 3 |                       | LI 4                                  | 4 |
| Sp 10                          | 20 | Sp 5               | 18 | LI4         | 1 | BI 25        | 5 |                       | LI 5                                  | 2 |
| Sp 11                          | 1  | Sp 6               | 17 |             |   | BI 26        | 5 |                       | LI 6                                  | 1 |
|                                |    | Sp 9               | 17 |             |   | BI 27        | 2 |                       | LI 10                                 | 3 |
| St 32                          | 1  | Sp 10              | 11 |             |   | BI 50        | 1 |                       | LI 11                                 | 4 |
| St 33                          | 1  |                    |    |             |   | BI 52        | 1 |                       |                                       |   |
| St 34                          | 16 | St 34              | 2  |             |   |              |   |                       | Lu 9                                  | 1 |
| St 35                          | 16 | St 35              | 7  |             |   | Du 4         | 3 |                       |                                       |   |
| St 36                          | 8  | St 36              | 8  |             |   |              |   |                       | PC6                                   | 1 |
| St 37                          | 1  | St 41              | 11 |             |   | GB 29        | 2 |                       | PC7                                   | 1 |
|                                |    | St 42              | 2  |             |   | GB 30        | 2 |                       |                                       |   |
| GB 34                          | 4  | St44               | 5  |             |   |              |   |                       | TB 5                                  | 1 |
| GB 35                          | 1  |                    |    |             |   | Huatuojiaji  | 1 |                       |                                       |   |
|                                |    | GB 34              | 5  |             |   |              |   |                       |                                       |   |
| LR 8                           | 4  | GB 39              | 5  |             |   |              |   |                       |                                       |   |
|                                |    | GB 40              | 6  |             |   |              |   |                       |                                       |   |
| Heding                         | 2  | GB 42              | 1  |             |   |              |   |                       |                                       |   |
| Xiyan                          | 14 | GB 43              | 1  |             |   |              |   |                       |                                       |   |
| Ashi point                     | 1  |                    |    |             |   |              |   |                       |                                       |   |
|                                |    | LR2                | 4  |             |   |              |   |                       |                                       |   |
|                                |    | LR3                | 8  |             |   |              |   |                       |                                       |   |
|                                |    | LR8                | 4  |             |   |              |   |                       |                                       |   |
|                                |    |                    |    |             |   |              |   |                       |                                       |   |
|                                |    | BI 57              | 1  |             |   |              |   |                       |                                       |   |
|                                |    | BI 58              | 4  |             |   |              |   |                       |                                       |   |
|                                |    |                    |    |             |   |              |   |                       |                                       |   |
|                                |    | Kid 3              | 7  |             |   |              |   |                       |                                       |   |
|                                |    | Kid 5              | 3  |             |   |              |   |                       |                                       |   |
|                                |    | Kid 6              | 2  |             |   |              |   |                       |                                       |   |
|                                |    | Kid 7              | 2  |             |   |              |   |                       |                                       |   |
|                                |    | Kid 10             | 1  |             |   |              |   |                       |                                       |   |
|                                |    |                    |    |             |   |              |   |                       |                                       |   |
|                                |    | Xiyan              | 4  |             |   |              |   |                       |                                       |   |
|                                |    | Ashi Points        | 2  |             |   |              |   |                       |                                       |   |
|                                |    | Heding             | 2  |             |   |              |   |                       |                                       |   |
|                                |    | Bafeng             | 1  |             |   |              |   |                       |                                       |   |
| <b>Other:</b>                  |    |                    |    |             |   |              |   |                       |                                       |   |
| Cupping Tx, F X 1              |    |                    |    |             |   |              |   |                       |                                       |   |
| Points for the shoulder, F X 9 |    |                    |    |             |   |              |   |                       |                                       |   |

Key: F, frequency; \*, acupuncture points not recorded; Tx, thoracic area.

Points for the shoulder: LI 14, LI 15, LI 16, TB 13, TB 14 SI 14, SI 15, Jianqian, ashi points.
